# Supplementary material for: Organic “receptor” fully covered few-layer organic–metal chalcogenides for high-performance chemiresistive gas sensing at room temperature
Source: Royal Society of Chemistry journal article supplement (doi:10.1039/d0cc01092h), 2020-01-01
Supplement: d0cc01092h1.pdf [file d0cc01092h1.pdf]

## **Organic “Receptor” Fully Covered Few-layer Organic-metal Chalcogenide for High-Performance Chemiresistive Gas Sensing at Room Temperature**

Huijie Jiang,<sup>ab</sup> Linan Cao,<sup>ab</sup> Yanzhou Li,<sup>a</sup> Wenhua Li,<sup>a</sup> Xiaoliang Ye,<sup>a</sup> Weihua Deng,<sup>ab</sup>  
Xiaoming Jiang,<sup>a</sup> GuanE. Wang,<sup>a</sup> and Gang Xu<sup>\*ab</sup>

<sup>a</sup> State Key Laboratory of Structural Chemistry, Fujian Institute of Research on the Structure of Matter,  
Chinese Academy of Sciences (CAS),

No. 155 Yangqiao Road West, Fuzhou, Fujian, 350002, P. R. China

<sup>b</sup> University of Chinese Academy of Sciences (UCAS),

No. 19A Yuquan Road, Beijing 100049, P. R. China

Corresponding author: Gang Xu

gxu@fjirsm.ac.cn

**Tab. of contents**

1. Synthesis of Ag(SPh-NH<sub>2</sub>)
2. Synthesis of Ag(SPh)
3. Characterizations
4. Fabrication of sensor devices
5. Gas sensor characterizations
6. Calculations of coefficient of variation and response

### 1. Synthesis of few-layer Ag(SPh-NH<sub>2</sub>)

A hydrothermal method was employed to synthesize few-layer Ag(SPh-NH<sub>2</sub>). Typically, 15  $\mu$ L HSPH-NH<sub>2</sub> (4-Aminobenzenethiol) and 7.5 mg silver nitrate were dissolved in 25 and 15 mL DI Water, respectively. Then the solution containing silver nitrate was added to the HSPH-NH<sub>2</sub> solution drop by drop with strong stirring in 5 minutes. After stirring for half an hour, the mixture turned to a transparent yellow solution and then was transferred to a 50 mL glass vial for keeping at 85 °C. After 24 hours, homogeneous pale yellow suspension was obtained as the product. The product was collected by centrifugation, and then washed by DI Water and ethanol for 3 times, respectively.

The few-layer Ag(SPh-NH<sub>2</sub>) suspension for thin film fabrication was prepared by dispersing the product in ethanol in a concentration of 2 mg mL<sup>-1</sup>.

### 2. Synthesis of few-layer Ag(SPh)

Typically, 17 mg silver nitrate and 67 mg benzenethiol (HSPH) were dissolved in 40 and 120 mL ethanol, respectively; then the solution containing silver nitrate was dropwisely added to the HSPH solution with strong stirring in 5 minutes. After that, the mixture was kept on stirring at room temperature. After 12 hours, uniform white suspension was obtained as the product. The product was collected by centrifugation, and then washed by ethanol for 3 times. Finally, the solid product was dispersed in ethanol to form a 2 mg mL<sup>-1</sup> suspension for thin film preparation.

### 3. Characterizations

Powder X-ray diffraction (PXRD) of samples were recorded on a Rigaku Smartlab X-ray diffractometer with 1D array detector using Cu K $\alpha$  radiation ( $\lambda = 1.54178 \text{ \AA}$ ). The morphology of samples was observed by scanning electron microscope (SEM, JEOL JSM-6700F) and transmission electron microscope (TEM, Tecnai F20). The thickness and size of samples were measured by scanning probe microscope (SPM, Dimension Icon). X-ray photoelectron spectroscopy (XPS) and ultra-violet photoelectron spectroscopy (UPS) were conducted on a Thermo Scientific ESCALAB 250 Xi XPS system. Fourier transform infrared spectroscopy (FTIR) spectra were recorded on a Bruker VERTEX70 FT-IR spectrometer (Germany) in 4000–400 cm<sup>-1</sup> region using KBr pellets. *In-situ* diffuse reflectance infrared Fourier transform spectroscopy (DRIFTS) experiments were performed on a 6700 Fourier transform-infrared spectrometer (Nicolet) equipped with a stainless steel *in-situ* IR flow cell and set up for diffuse reflectance sampling. UV-vis diffuse reflectance spectra (DRS) were recorded on a Lamda 950 (PerkinElmer, USA) using BaSO<sub>4</sub> as a reference. The electrical measurements were performed using a Keithley 4200 (USA) semiconductor characterization system.

### 4. Fabrication of thin film devices

The thin films were fabricated by conventional spin-coating method. Quartz substrates (2 \* 2 cm) used here were washed with DI Water, acetone, ethanol via sonication for 10 minutes, separately; then the substrates were dried by Argon flow and then dried at 100 °C. Typically, the sample suspension was dropped on the surface of quartz to fully cover the surface; firstly rotated at low speed of 100 rpm for 20 seconds and followed by high-speed rotation of 2000 rpm for 20 seconds to remove extra suspension; then repeated this process for 10 times successively; finally, all the films were dried at 85 °C for one hour. After that, 5 nm Cr and 50 nm Au were deposited on films successively by thermal evaporation (RH 400, Shenyang Pengcheng Vacuum Technology Co. Ltd., China) to form an interdigital electrode with a gap width of 0.5  $\mu$ m.

### 5. Gas sensing measurements

The sensing property assessment was performed with a home-made system reported in our previous work<sup>1</sup>. The

devices were connected to this test system by two Au wires with conductive silver paint. All tests were performed at room temperature. It cost about 40 s to fulfill the chamber of test system when the gas flow was  $600 \text{ mL min}^{-1}$ . Two mass flow controllers were used to accurately control the flows of the analyte gases and dry air, respectively, to obtain controlled concentrations of the target gases. The constant flow was  $600 \text{ mL min}^{-1}$ , the bias on the sensor was 5 V and the electrical signal was recorded by using Keithley 2602B Sourcemeter.

#### 6. Calculations of response, response / recovery time and coefficient of variation

The response ( $R$ ) is defined as:  $R = (R_{\text{analyte}} / R_{\text{air}} - 1)$  or  $R = (R_{\text{air}} / R_{\text{analyte}} - 1)$ , Where  $R_{\text{air}}$  and  $R_{\text{analyte}}$  are the resistance of the devices in air and analyte, respectively.

The response time of the sensor is the time required increasing the response to 90% of the saturation value and the recovery time is the time required decreasing the response to its 10%.

The coefficient of variation (CV) is defined as:  $CV = R_{\text{SD}} / R_{\text{average}} \times 100\%$ , where  $R_{\text{SD}}$  and  $R_{\text{average}}$  are the standard deviation (SD) and average value of responses with five successive cycles.

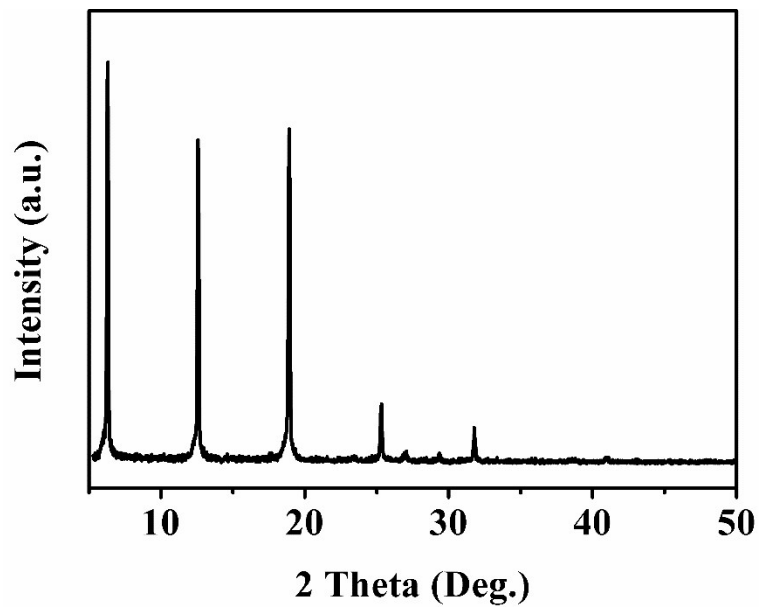

Fig. S1 PXRD pattern of few-layer Ag(SPh).

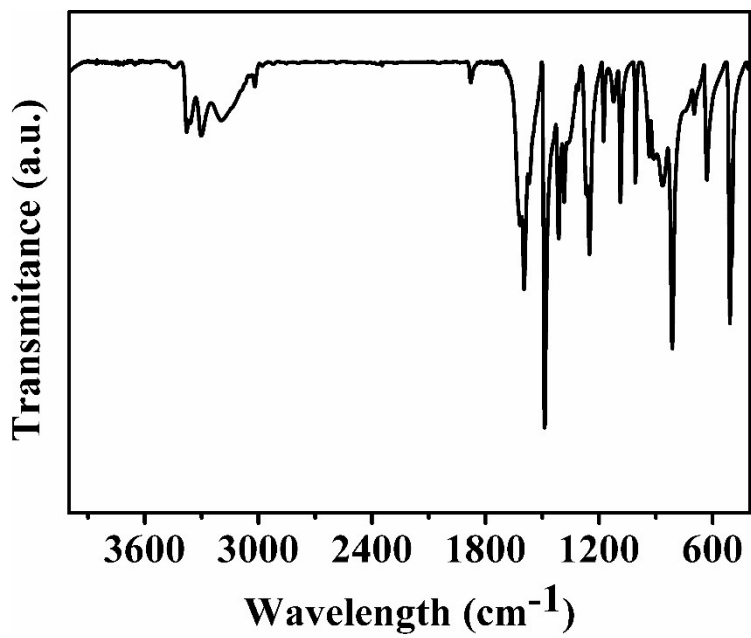

Fig. S2 FTIR spectrum of Ag(SPh-NH<sub>2</sub>).

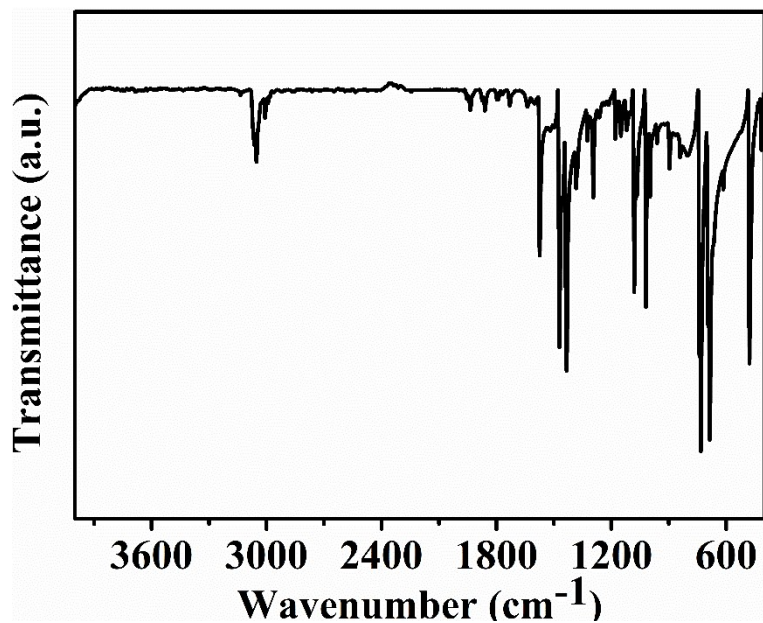

Fig. S3 FTIR spectrum of Ag(SPh).

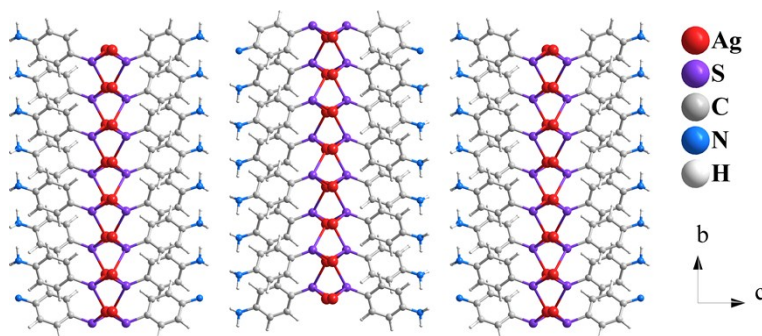

Fig. S4 Packing structure of Ag(SPh-NH<sub>2</sub>) perpendicular to a direction.

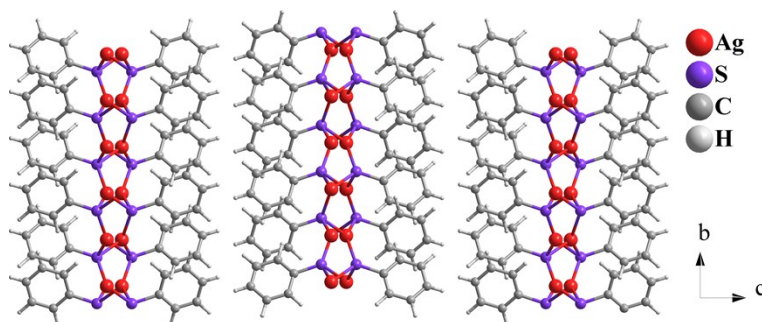

Fig. S5 Packing structure of Ag(SPh) perpendicular to a direction.

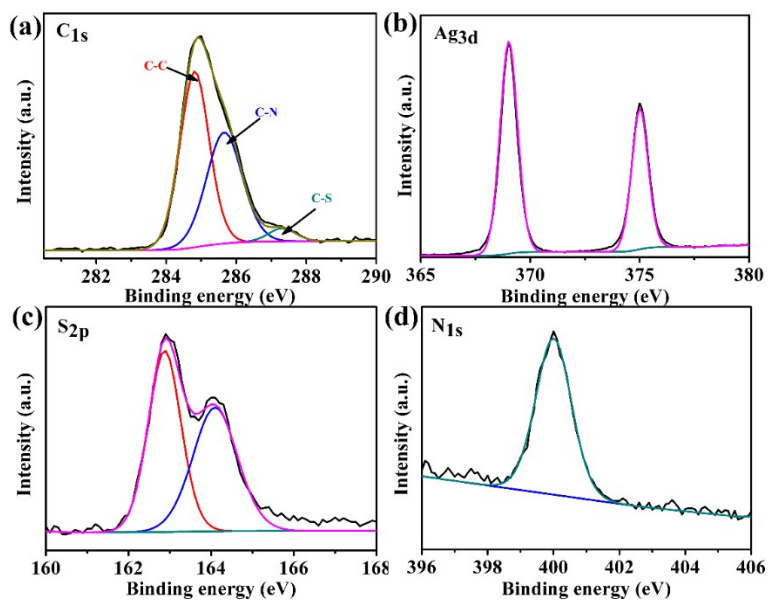

Fig. S6 High-resolution XPS spectrum of C<sub>1s</sub>, Ag<sub>3d</sub>, S<sub>2p</sub>, N<sub>1s</sub> of Ag(SPh-NH<sub>2</sub>).

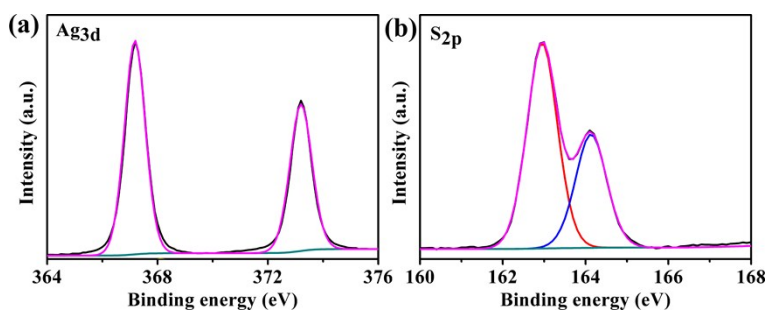

Fig. S7 High-resolution XPS spectrum of Ag<sub>3d</sub>, S<sub>2p</sub>, of Ag(SPh).

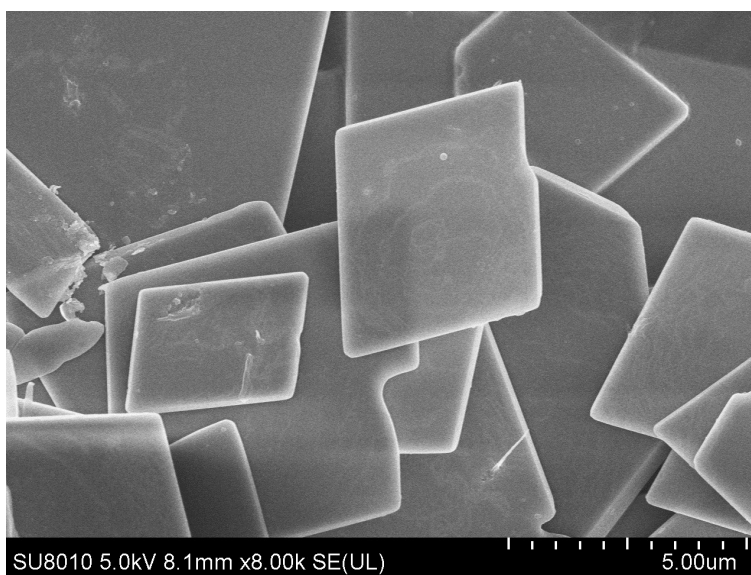

Fig. S8 SEM image of Ag(SPh).

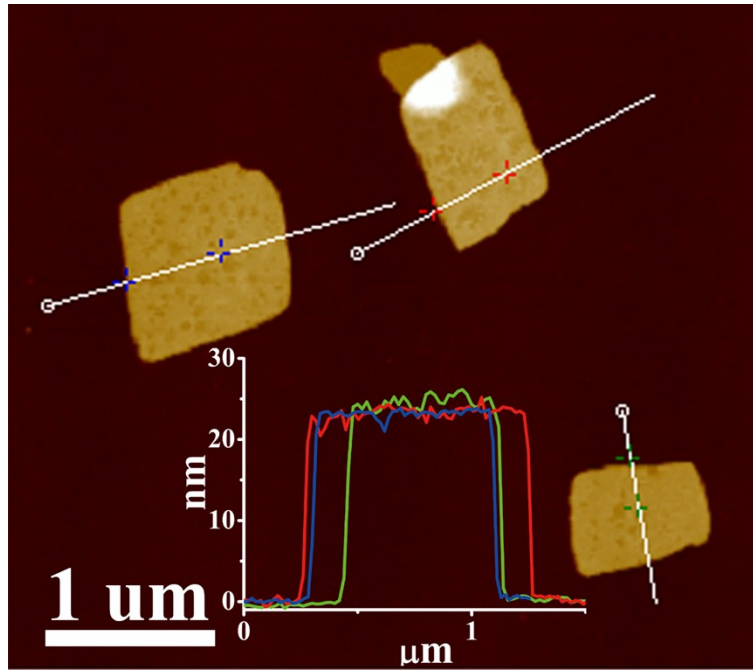

Fig. S9 AFM image of few-layer Ag(SPh).

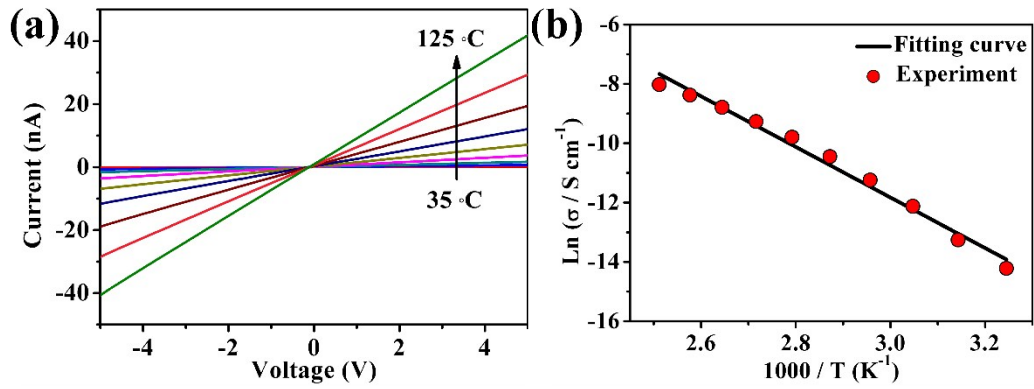

Fig. S10 a) Temperature-dependent I-V curves and b) temperature-dependent conductivity of Ag(SPh-NH<sub>2</sub>).

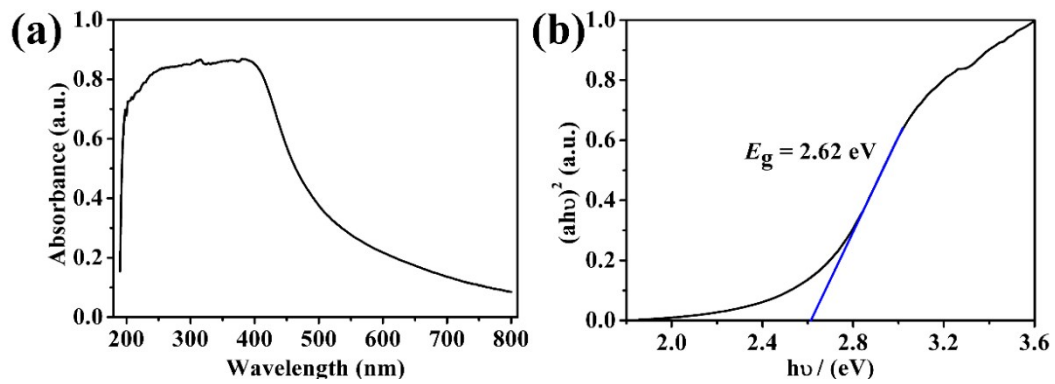



Fig. S11 a) UV-vis DRS and b) optical band gap of Ag(SPh-NH<sub>2</sub>).

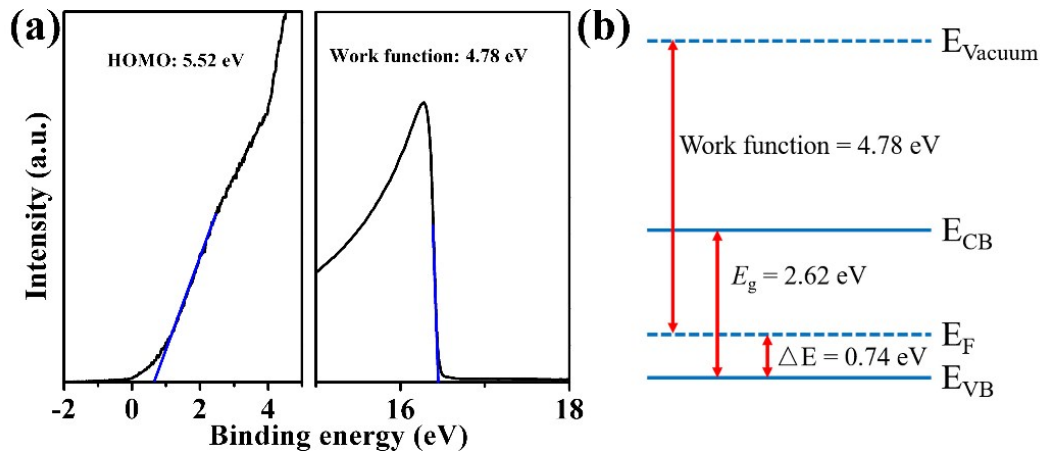

Fig. S12 a) UPS and b) energy band diagram of Ag(SPh-NH<sub>2</sub>).

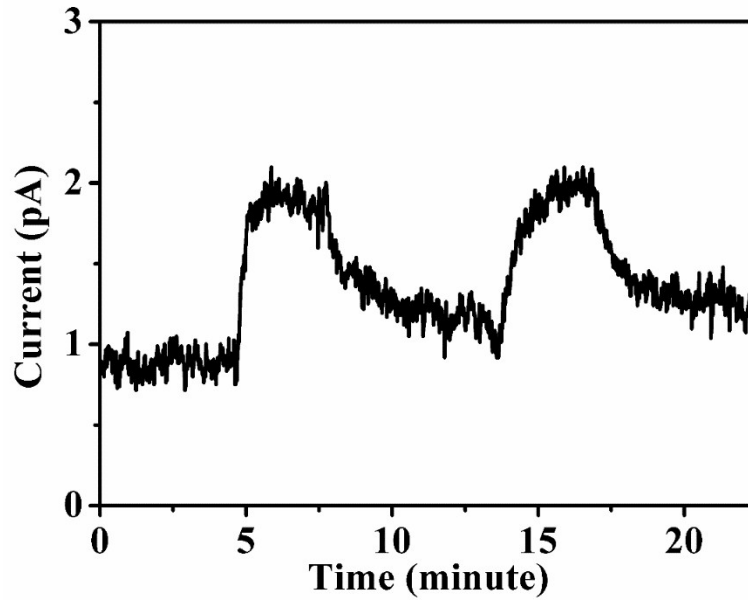

Fig. S13 Response and recovery curve of few-layer Ag(SPh-NH<sub>2</sub>) to 0.1 ppm NO<sub>2</sub>.

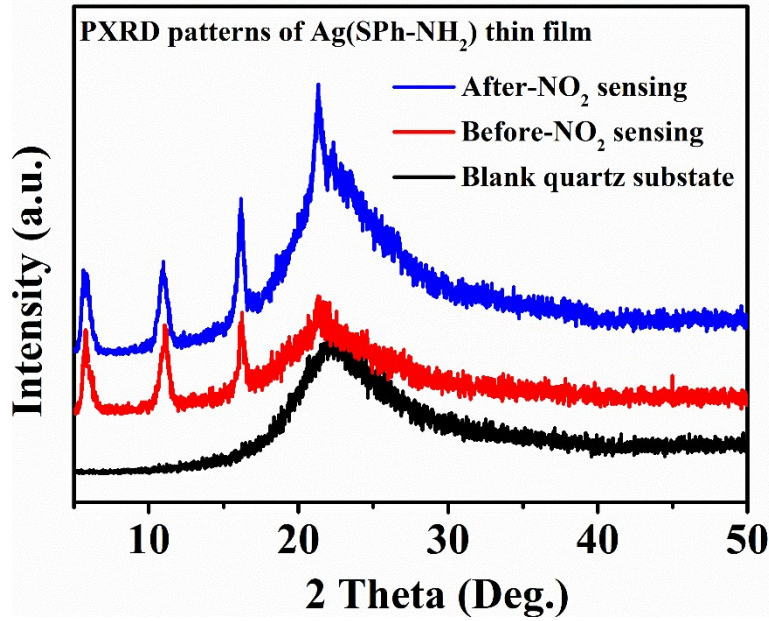

Fig. S14 PXRD patterns of Ag(SPh-NH<sub>2</sub>) thin film before and after NO<sub>2</sub> sensing.

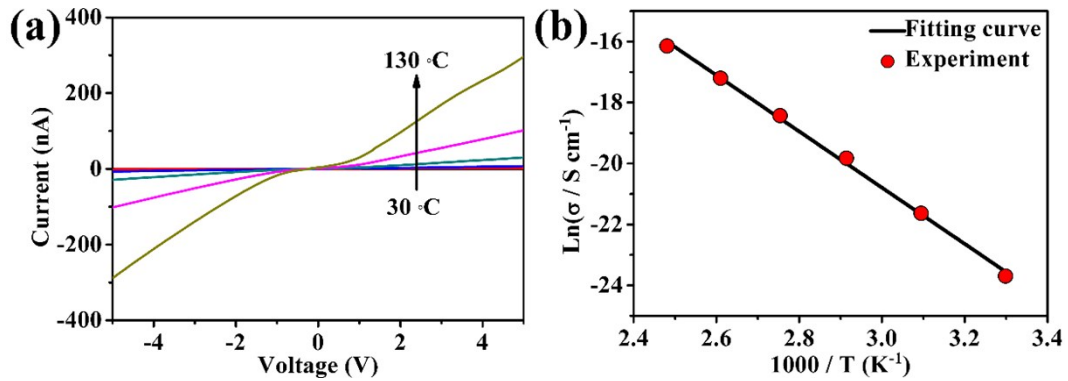

Fig. S15 a) Temperature-dependent I-V curves and b) Temperature-dependent conductivity of Ag(SPh).

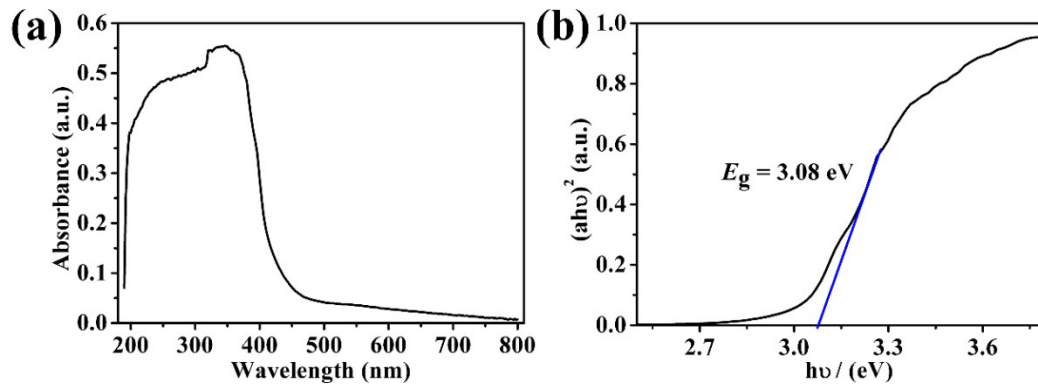

Fig. S16 a) UV-vis DRS) and b) optical band gap of Ag(SPh).

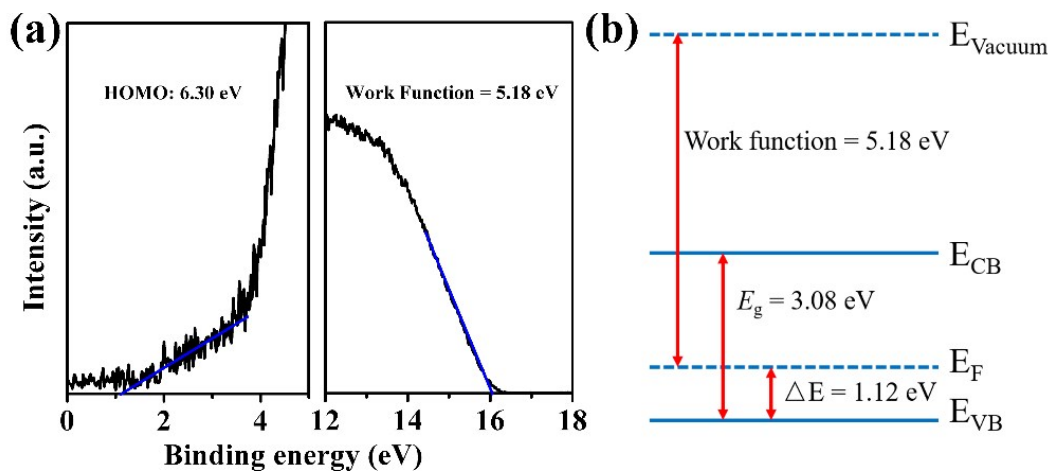

Fig. S17 a) UPS) and b) energy band diagram of Ag(SPh).

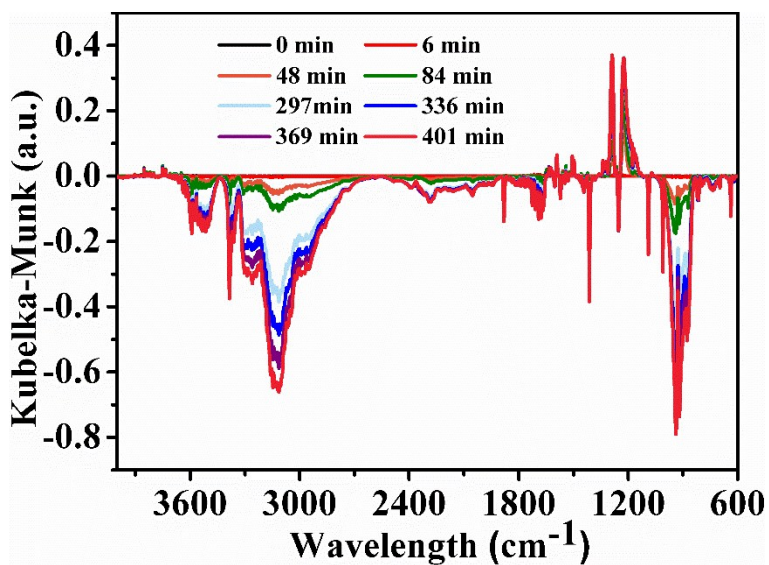

Fig. S18 *In-situ* DRIFTS of Ag(SPh-NH<sub>2</sub>) being exposed to NO<sub>2</sub> gas.

Tab. S1 Elemental analysis of Ag(SPh-NH<sub>2</sub>) and Ag(SPh).

| Compound                 | C<br>(Theoretical) | C<br>(Experimental) | S<br>(Theoretical) | S (Experimental) | H<br>(Theoretical) | H<br>(Experimental) |
|--------------------------|--------------------|---------------------|--------------------|------------------|--------------------|---------------------|
| Ag(SPh-NH <sub>2</sub> ) | 31.06              | 29.85               | 13.82              | 13.88            | 2.61               | 2.52                |
| Ag(SPh)                  | 33.20              | 32.64               | 14.77              | 13.67            | 2.32               | 2.01                |

Tab. S2 Response values of Ag(SPh-NH<sub>2</sub>) to 10 ppm NO<sub>2</sub> within five cycles.

| cycle        | 1    | 2    | 3    | 4    | 5    |
|--------------|------|------|------|------|------|
| Response (%) | 1080 | 1097 | 1084 | 1053 | 1034 |

Tab. S3 Sensing performances of typical 2D material-based RT chemiresistive NO<sub>2</sub> sensor.

| Sensing layer          | Sensitivity (%) | Response & Recovery time (min) | LOD (ppb) | Ref. |
|------------------------|-----------------|--------------------------------|-----------|------|
| MoS <sub>2</sub>       | 120 @ 1ppm      | -/-                            | 120       | 2    |
| MoSe <sub>2</sub>      | 90 @ 100 ppm    | 5/10                           | 5000      | 3    |
| WS <sub>2</sub>        | 68 @ 5 ppm      | -/-                            | 100       | 4    |
| NbS <sub>2</sub>       | 18 @ 5 ppm      | 50/150                         | 240       | 5    |
| Graphene               | 25 @ 200 ppm    | 2/5                            | -         | 6    |
| Bilayer Graphene       | 12.87 @ 5 ppm   | -/-                            | -         | 7    |
| GO                     | 17 @ 5 ppm      | -/-                            | 650       | 8    |
| RGO                    | 1.5 @ 100 ppm   | 5/20                           | -         | 9    |
| Holey RGO              | 31.8 @ 3 ppm    | -/-                            | 60        | 10   |
| Ozone treated Graphene | 16 @ 200 ppm    | 15/30                          | 1.3       | 11   |
| S-G                    | 88 @ 5 ppm      | 5/30                           | 3600      | 12   |

|                          |                |          |     |           |
|--------------------------|----------------|----------|-----|-----------|
| EDA-G                    | 22 @ 1 ppm     | 10/30    | 70  | 12        |
| CFGO                     | 76.3 @ 5 ppm   | -/-      | -   | 13        |
| ANS-RGO                  | 95 @ 10 ppm    | 3.3/23.3 | -   | 14        |
| BP                       | 80 @ 1 ppm     | 1.2/-    | 100 | 15        |
| Ag(SPh-NH <sub>2</sub> ) | 852.6 @ 10 ppm | 1.0/2.3  | 0.9 | This work |

Tab. S4 Response of Ag(SPh-NH<sub>2</sub>) to NO<sub>2</sub> and other interference gases.

| Gases         | NO <sub>2</sub> | SO <sub>2</sub> | CO <sub>2</sub> | H <sub>2</sub> S | EtOH | CO  | H <sub>2</sub> | CH <sub>4</sub> | Benzene | Toluene | NH <sub>3</sub> | TEA | Acetone |
|---------------|-----------------|-----------------|-----------------|------------------|------|-----|----------------|-----------------|---------|---------|-----------------|-----|---------|
| Con.<br>(ppm) | 100             | 10              | 100             | 100              | 100  | 100 | 100            | 100             | 100     | 100     | 100             | 100 | 100     |
| Response      | 2017            | 0               | 6.1             | 10.1             | 9.3  | 7.5 | 10.5           | 10.3            | 11.1    | 12.7    | -8.1            | -15 | -6.5    |

## References

- 1 M. S. Yao, W. X. Tang, G. E. Wang, B. Nath and G. Xu, *Adv. Mater.*, 2016, **28**, 5229.
- 2 B. Cho, A. R. Kim, Y. Park, J. Yoon, Y. J. Lee, S. Lee, T. J. Yoo, C. G. Kang, B. H. Lee, H. C. Ko, D. H. Kim and M. G. Hahm, *ACS Appl. Mater. Inter.*, 2015, **7**, 2952.
- 3 S. Zhang, T. H. Nguyen, W. Zhang, Y. Park and W. Yang, *Appl. Phys. Lett.*, 2017, **111**, 161603.
- 4 T. T. Xu, Y. Y. Liu, Y. Y. Pei, Y. P. Chen, Z. M. Jiang, Z. F. Shi, J. M. Xu, D. Wu, Y. T. Tian and X. J. Li, *Sens. Actuators B Chem.*, 2018, **259**, 789.
- 5 Y. Kim, K. C. Kwon, S. Kang, C. Kim, T. H. Kim, S. P. Hong, S. Y. Park, J. M. Suh, M. J. Choi, S. Han and H. W. Jang, *ACS Sens.*, 2019, **4**, 2395.
- 6 C. Lee, J. Ahn, K. B. Lee, D. Kim and J. Kim, *Thin Solid Films*, 2012, **520**, 5459.
- 7 Y. Seekaew, D. Phokharatkul, A. Wisitsoraat and C. Wongchoosuk, *Appl. Surf. Sci.*, 2017, **404**, 357.
- 8 Y. R. Choi, Y. G. Yoon, K. S. Choi, J. H. Kang, Y. S. Shim, Y. H. Kim, H. J. Chang, J. H. Lee, C. R. Park, S. Y. Kim and H. W. Jang, *Carbon*, 2015, **91**, 178.
- 9 G. Lu, L. E. Ocola and J. Chen, *Nanotechnology*, 2009, **20**, 445502.
- 10 D. H. Wang, Y. Hu, J. J. Zhao, L. L. Zeng, X. M. Tao and W. Chen, *J. Mater. Chem. A*, 2014, **2**, 17415.
- 11 M. G. Chung, D. H. Kim, H. M. Lee, T. Kim, J. H. Choi, D. K. Seo, J. B. Yoo, S. H. Hong, T. J. Kang, and Y. H. Kim, *Sens. Actuators B Chem.*, 2012, **166**, 172.
- 12 W. Yuan, A. Liu, L. Huang, C. Li and G. Shi, *Adv. Mater.*, 2013, **25**, 766.
- 13 Y. H. Kim, J. S. Park, Y. R. Choi, S. Y. Park, S. Y. Lee, W. Sohn, Y. S. Shim, J. H. Lee, C. R. Park, Y. S. Choi, B. H. Hong, J. H. Lee, W. H. Lee, D. Lee and H. W. Jang, *J. Mater. Chem. A*, 2017, **5**, 19116.
- 14 W. L. Pei, T. T. Zhang, Y. Wang, Z. Chen, A. Umar, H. Li and W. Guo, *Nanoscale*, 2017, **9**, 16273.
- 15 S. Y. Cho, Y. Lee, H. J. Koh, H. Jung, J. S. Kim, H. W. Yoo, J. Kim and H. T. Jung, *Adv. Mater.*, 2016, **28**, 7020.
